# Supplementary material for: Alpha-glucans from bacterial necromass indicate an intra-population loop within the marine carbon cycle
Source: PubMed Central journal article supplement (PMC11093988; doi:10.1038/s41467-024-48301-5), 2024-05-14
Supplement: 41467_2024_48301_MOESM1_ESM.pdf [file 41467_2024_48301_MOESM1_ESM.pdf]

## Supplementary information

### **Alpha-glucans from bacterial necromass indicate an intra-population loop within the marine carbon cycle**

Irena Beidler<sup>1</sup>, Nicola Steinke<sup>2,3</sup>, Tim Schulze<sup>1</sup>, Chandni Sidhu<sup>2</sup>, Daniel Bartosik<sup>1,4</sup>, Marie-Katherin Zühlke<sup>1</sup>, Laura Torres Martin<sup>1</sup>, Joris Krull<sup>1,2</sup>, Theresa Dutschei<sup>5</sup>, Borja Ferrero-Bordera<sup>6</sup>, Julia Rielicke<sup>6</sup>, Vaikhari Kale<sup>6</sup>, Thomas Sura<sup>6</sup>, Anke Trautwein-Schult<sup>6</sup>, Inga V. Kirstein<sup>7</sup>, Karen H. Wiltshire<sup>7</sup>, Hanno Teeling<sup>2</sup>, Dörte Becher<sup>6</sup>, Mia Maria Bengtsson<sup>8</sup>, Jan-Hendrik Hehemann<sup>2,3</sup>, Uwe. T. Bornscheuer<sup>5</sup>, Rudolf I. Amann<sup>2</sup>, Thomas Schweder<sup>1,4,7\*</sup>

<sup>1</sup> Pharmaceutical Biotechnology, Institute of Pharmacy, University of Greifswald, 17489 Greifswald, Germany

<sup>2</sup> Max Planck Institute for Marine Microbiology, 28359 Bremen, Germany

<sup>3</sup> University of Bremen, Center for Marine Environmental Sciences, MARUM, 28359 Bremen, Germany

<sup>4</sup> Institute of Marine Biotechnology, 17489 Greifswald, Germany

<sup>5</sup> Biotechnology and Enzyme Catalysis, Institute of Biochemistry, University of Greifswald, 17489 Greifswald, Germany

<sup>6</sup> Microbial Proteomics, Institute of Microbiology, University of Greifswald, 17489 Greifswald, Germany

<sup>7</sup> Alfred Wegener Institute for Polar and Marine Research, Biologische Anstalt Helgoland, 27483, Helgoland, Germany

<sup>8</sup> Microbial Physiology and Molecular Biology, Institute of Microbiology, University of Greifswald, 17489 Greifswald, Germany

\* corresponding author:

Thomas Schweder, [schweder@uni-greifswald.de](mailto:schweder@uni-greifswald.de)

## Supplementary figures

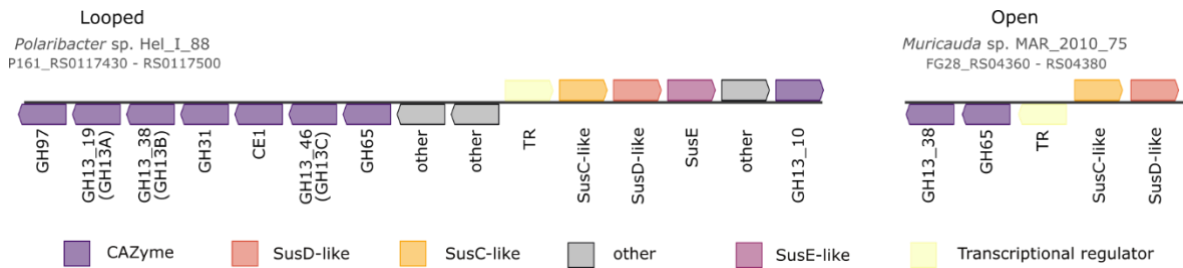

**Figure S1.  $\alpha$ -glucan PUL composition of *Polaribacter* sp. Hel\_I\_88 and *Muricauda* sp. MAR\_2010\_75.** PULs contain at least one GH13 and the characteristic *susC/D* coding for the binding and uptake machinery. Complexity of the PUL seems to correspond to the type of SusD (detailed in **Figure 2**) encoded, with “looped” SusD-containing PULs encoding more CAZymes, while “open” SusD-containing PULs are simpler.

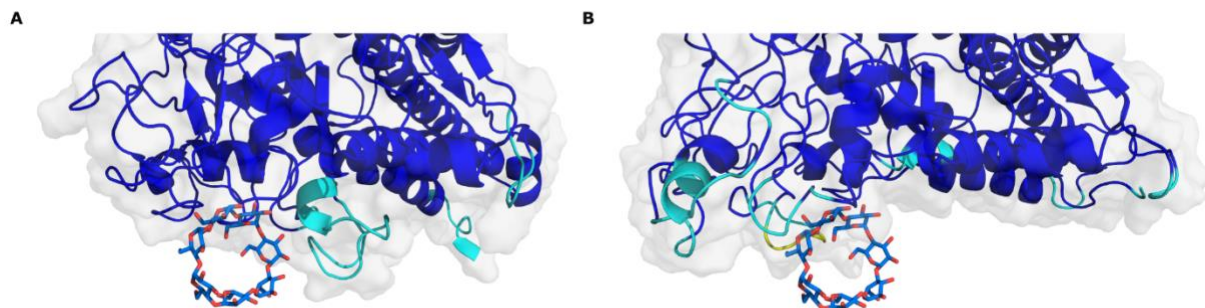

**Figure S2. Structure prediction of the  $\alpha$ -glucan PUL encoded SusDs.** Shown is a surface model of (A) *Flavimarina* sp. Hel\_I\_48 (representative of the looped group, Sup. Dataset 5) and (B) *Muricauda* sp. MAR\_2010\_75 (representative of the open group, Sup. Dataset 6) alongside the structure cartoon overlaid with a cyclodextrin substrate (blue) as observed in *B. thetaiotaomicron* (PBD: 3CK8). Color of the models indicates the alpha fold confidence score (pLDDT) in the groups “very high” (>90) dark blue, “high” (90-71) cyan, “low” (70-51) yellow and “very low” (<50) orange.

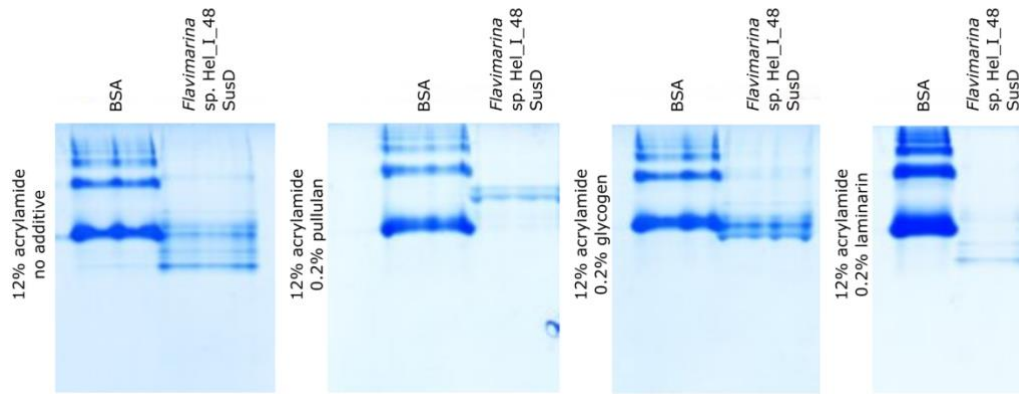

**Figure S3.** The  $\alpha$ -glucan PUL-encoded SusD of *Flavimarina* sp. Hel\_I\_48 shows affinity to glycogen and pullulan. Experiments were performed using native gels with no additive or 0.2% polysaccharide. BSA was used as non-binding control.

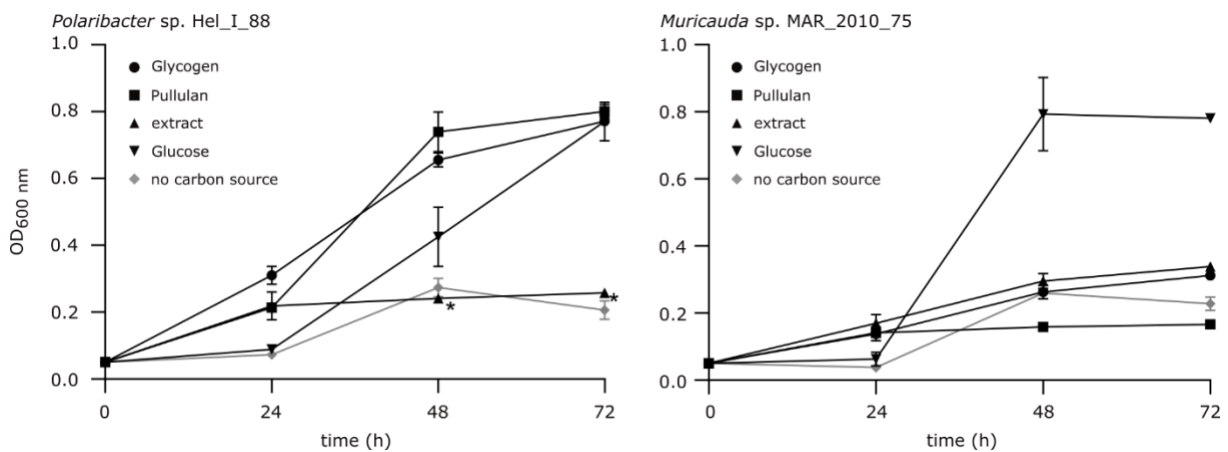

**Figure S4.** Growth of *Polaribacter* sp. Hel\_I\_88 and *Muricauda* sp. MAR\_2020\_75 on glycogen, pullulan and extracted intracellular polysaccharide of *Polaribacter* sp. Growth was determined (n=3) in marine minimal medium (MPM) containing the tested polysaccharide or extract as sole carbon source compared to controls using either glucose or no carbon source. \*indicates the formation of bacterial aggregates during growth, hindering an accurate measurement.

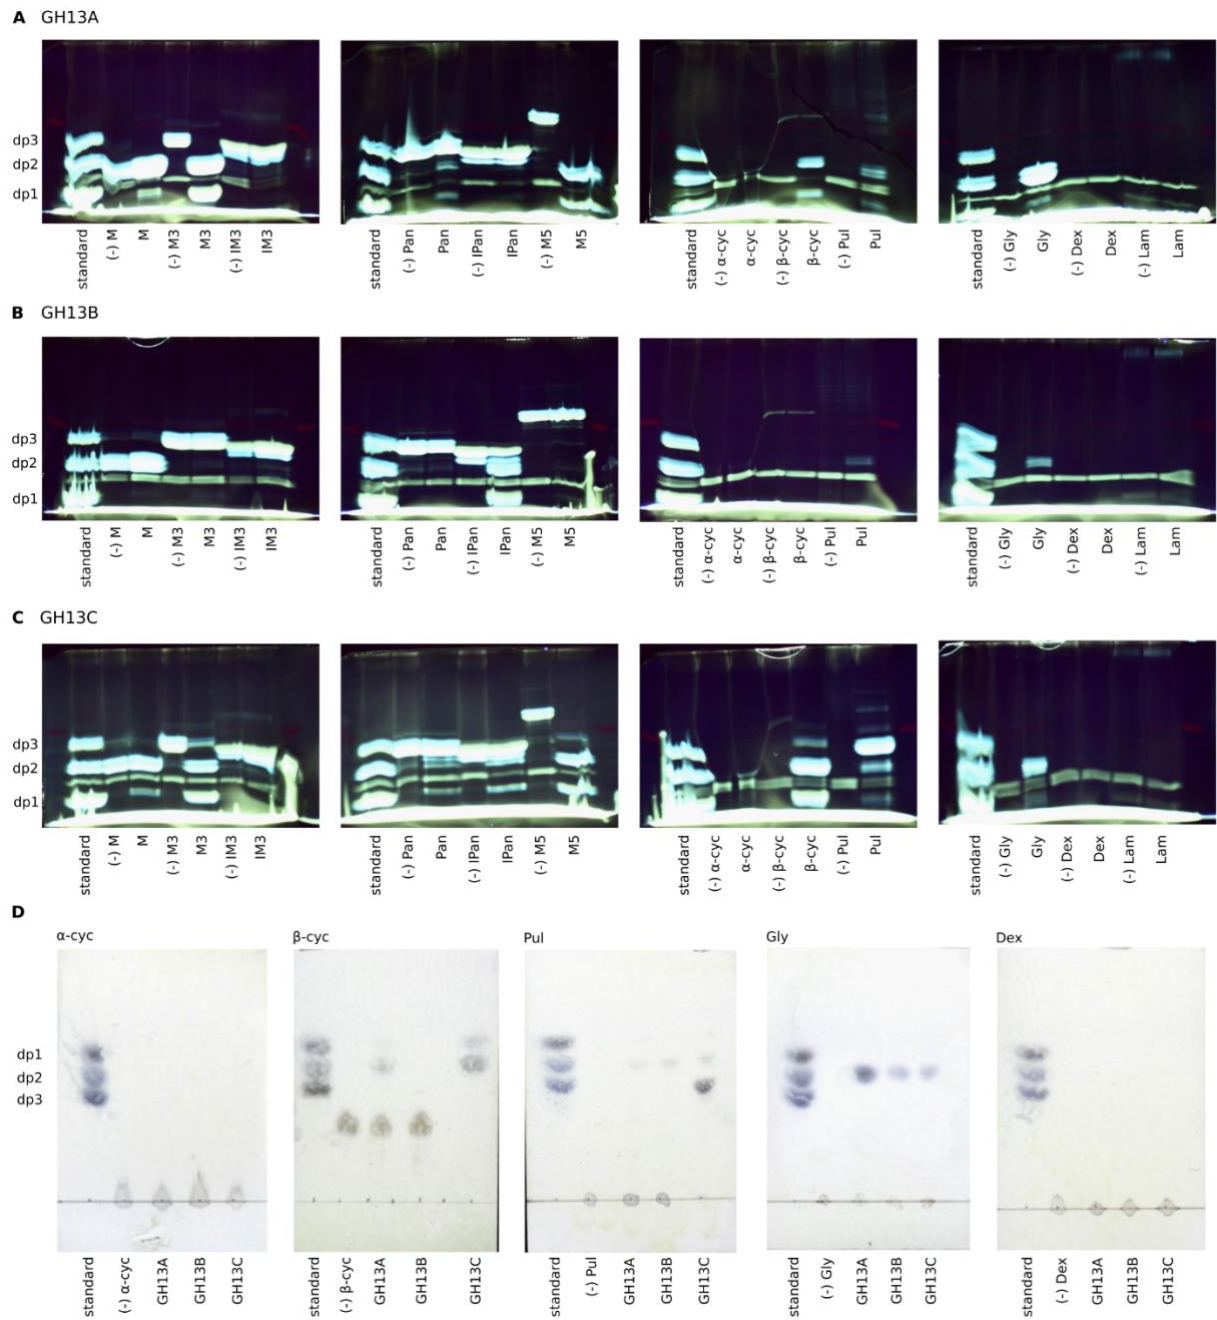

**Figure S5. GH13 enzymes from *Polaribacter* sp. PUL act on diverse glucans.** Degradation profiles of (A) GH13A, (B) GH13B and (C) GH13C via FACE on different poly- and oligosaccharides. (D) TLC-analysis of cyclodextrins and polysaccharides incubated with GH13A, GH13B and GH13C. Reactions were carried out with 25  $\mu$ g of protein and 0.5% poly-/oligosaccharide for 24 h. M: Maltose, M3: Maltotriose, IM3: Isomaltotriose, Pan: Panose, IPan: Isopanose, M5: maltopentose  $\alpha$ -cyc:  $\alpha$ -cyclodextrin,  $\beta$ -cyc:  $\beta$ -cyclodextrin, Pul: Pullulan, Gly: Glycogen, Dex: Dextrin, Lam: Laminarin, (-): no enzyme.

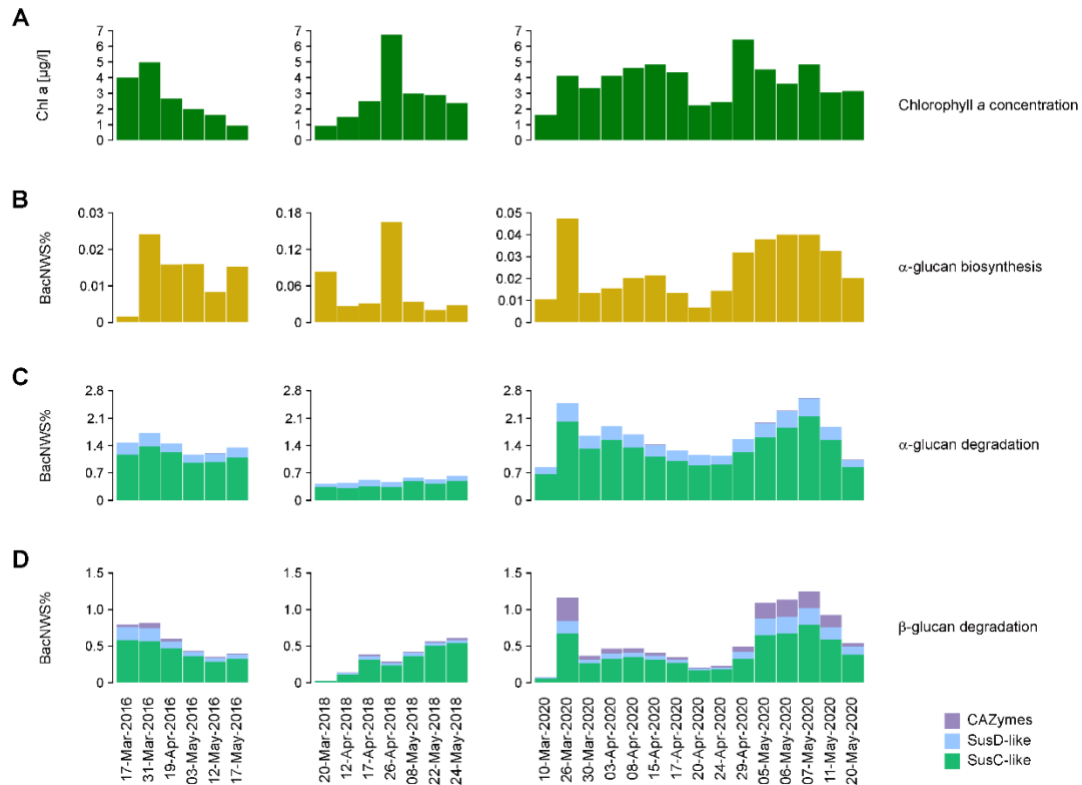

**Figure S6. Glg-protein abundance during phytoplankton blooms relates to those of  $\alpha$ -glucan and  $\beta$ -glucan-targeting proteins of the planktonic bacteria.** (A) Progression of three separate Helgoland bloom events (2016, 2018, 2020) as observed via chlorophyll a measurements. For each bloom, metaproteomes of the  $>0.2 \mu\text{m}$  fraction were searched for proteins involved in  $\alpha$ -glucan biosynthesis (Glg-pathway) (B),  $\alpha$ -glucan PUL (C) and  $\beta$ -glucan PUL-encoded (D) proteins. Relative abundances are given as normalized weighted spectra of the bacterial fraction (BacNWS%).

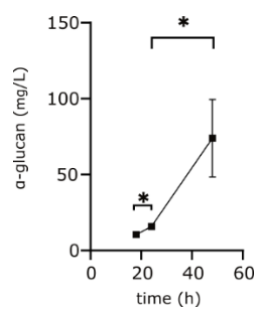

**Figure S7. Bacteria produce significant amounts of  $\alpha$ -glucan while growing on laminarin.** Accumulated  $\alpha$ -glucan amounts from three biological replicates of *Polaribacter* sp. Hel\_I\_88 grown on laminarin as sole carbon source (\* = unpaired one-sided t-test P value  $< 0.05$ ) as determined via specific enzymatic hydrolysis followed by PAHBAH-assay.

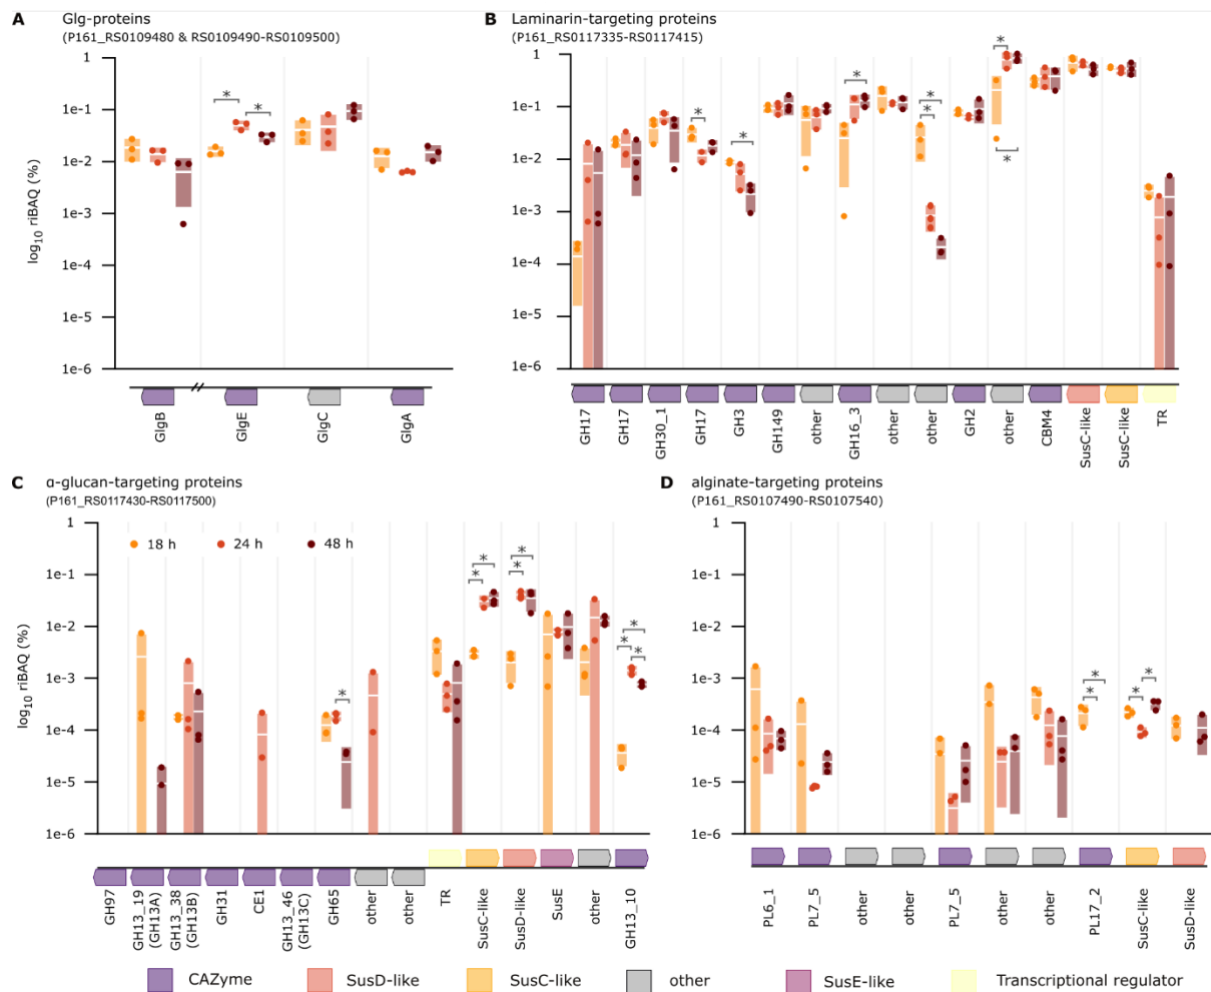

**Figure S8. During growth on laminarin, *Polaribacter* sp. shows expression of proteins responsible for  $\alpha$ -glucan synthesis and utilization.** *Polaribacter* sp. was grown on laminarin as sole carbon source and samples were taken at 18, 24 and 48 h, respectively. Protein abundances of Glg-proteins (A), laminarin PUL proteins (B),  $\alpha$ -glucan PUL proteins (C) and alginate PUL proteins (D) are shown over time. Given are all non-0 values with standard deviation (bars) and mean value (white line). Significance as determined by one-way ANOVA followed by post hoc Tukey's HSD test ( $p$ -value  $<0.05$ ) is depicted as an asterisk with the bars. Abundances are given as manually calculated rBAQ (%) values. Gene clusters are depicted beneath the protein abundances and specific CAZyme annotations are provided underneath.

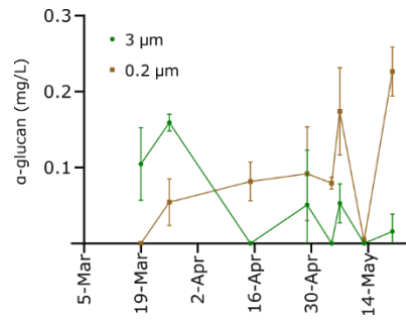

**Figure S9. Bacteria of the 2020 Helgoland phytoplankton bloom produce  $\alpha$ -glucan during peak bloom phases.**  $\alpha$ -glucan concentration on 0.2  $\mu\text{m}$  and 3  $\mu\text{m}$  fraction 2020 Helgoland bloom filters (three technical replicates) were determined via specific enzymatic hydrolysis followed by PAHBAH-assay. All values are corrected for volume filtered.

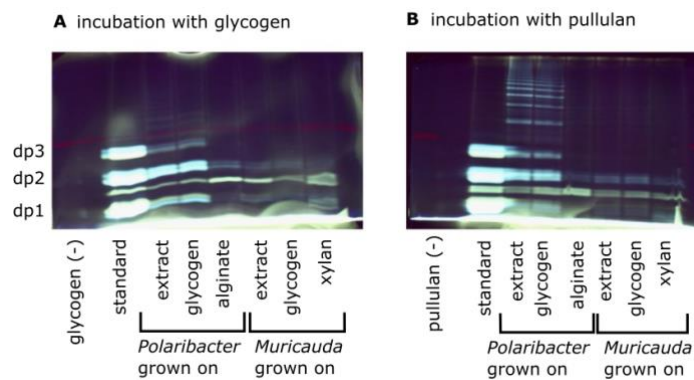

**Figure S10. FACE-based enzyme activity assays of culture lysates of the two model bacteria *Polaribacter* sp. Hel\_I\_88 and *Muricauda* sp. MAR\_2010\_75 grown with different polysaccharides.** Lysate of cultures grown on extracted bacterial  $\alpha$ -glucans, glycogen and alginate or xylan were incubated (A) with glycogen and (B) with pullulan to test for substrate-induced differential PUL expression activities. Mixtures of glucose (dp1), maltose (dp2) and maltotriose (dp3) were used as standards.
