# Supplementary material for: Alpha-glucans from bacterial necromass indicate an intra-population loop within the marine carbon cycle
Source: PubMed Central journal article supplement (PMC11093988; doi:10.1038/s41467-024-48301-5), 2024-05-14
Supplement: 41467_2024_48301_MOESM3_ESM.pdf [file 41467_2024_48301_MOESM3_ESM.pdf]

## **Description of Additional Supplementary Files:**

**Supplementary Dataset 1:** 18S rDNA read counts of the Helgoland spring phytoplankton bloom from March to May 2020. Read counts from 3 and 10  $\mu\text{m}$  fractions (Sheets 1 & 2) were summed. Relative abundances of groups of significant eukaryotes were plotted in Figure 1.

**Supplementary Dataset 2:** List of all isolate and MAG-encoded PUL-associated GH13s.

**Supplementary Dataset 3:** Proteomics of *Polaribacter* sp. Hel\_I\_88 grown on laminarin with samples taken at 18, 24 and 48 h

**Supplementary Dataset 4:** Proteomics of *Polaribacter* sp. Hel\_I\_88 and *Muricauda* sp. MAR\_2010\_75 grown on extracted polysaccharides from *Polaribacter* sp. as well as glycogen, alginate and xylan as controls.

**Supplementary Data 5:** Dataset for protein structure prediction of *Flavimarina*\_Hel\_1\_48\_SusD

**Supplementary Data 6:** Data set for protein structure prediction of *Muricauda*\_MAR\_2010\_75\_SusD
